# Supplementary material for: Real-World, Non-Interventional, Observational Study of Hydroxyzine Hydrochloride in Chronic Pruritus: a Prospective, Non-Comparative Study
Source: Springer Nature journal article supplement (doi:10.1007/s13555-019-0293-2), 2019-04-04
Supplement: MOESM1 [file 16609722]

### **Ethics Committee Approval**

The study documents were reviewed and approved by the respective Institutional/Independent Ethics Committees and the study was conducted in accordance with the principles of Declaration of Helsinki (World Medical Association) and Good Clinical Practice guidelines issued by the ICMR & DCGI, Govt. of India. See below for a complete list of the ethics committees which approved this study. All the patients were explained about the study details and were provided opportunity to raise any queries/doubts about the study. Written informed consent was obtained from all patients before enrolment. The study was registered in the clinical trials registry of India (CTRI/2017/06/008847; Registered on: 15/06/2017).

| <b>Name of PI</b>      | <b>Site name</b>        | <b>EC Name</b>                            | <b>EC Address</b>                                                                                                                                |
|------------------------|-------------------------|-------------------------------------------|--------------------------------------------------------------------------------------------------------------------------------------------------|
| Dr. D. G. Saple        | La Mer Clinic, Dadar.   | Suraksha Ethics Committee                 | Asian Institute of Medical Science (AIMS), Plot P-72, Milap Nagar, MIDC, Dombivli (E)                                                            |
| Dr. Rashid Shaikh      | Rehamat Clinic, Thane   | Suraksha Ethics Committee                 | Asian Institute of Medical Science (AIMS), Plot P-72, Milap Nagar, MIDC, Dombivli (E)                                                            |
| Dr. Hemangi Jerajani   | MGM, Panvel             | MGM Institute of Health Sciences          | Mgm Institute of Health Sciences post box No. 06. 3rd floor, MGM Educational Complex, Plot No. 1 & 2, Sector - 1, Kamothe, Navi-Mumbai - 410 209 |
| Dr. Ravindra Babu      | Raga Skincare clinic    | Gurushree Hitech Multispeciality Hospital | Gurushree Hitech Multispeciality Hospital Ethics Committee, 1558, Opp. Chandra Layout Bus Stand, Chandra Layout, Vijaynagar, Bangalore 560040,   |
| Dr. Krupa Shankar      | Mallige medical centre  | Gurushree Hitech Multispeciality Hospital | Gurushree Hitech Multispeciality Hospital Ethics Committee 1558, Opp. Chandra Layout Bus Stand, Chandra Layout, Vijaynagar, Bangalore 560040,    |
| Dr. Dhanalakshmi       | Madaras Medical college | Universal Ethics Committee                | No. G1 & G2, RR Villa, 180/109, Kodambakkam, Chennai 600 024                                                                                     |
| Dr. Jayakar Thomas     | Skincare centre         | Universal Ethics Committee                | No. G1 & G2, RR Villa, 180/109, Kodambakkam, Chennai 600 025                                                                                     |
| Dr. Narsimha Rao Netha | Gandhi Medical college  | Gandhi Medical College                    | Institutional Ethics Committee Gandhi Medical College, Secunderabad - 500003                                                                     |
